# Supplementary material
Source: Springer Nature journal article supplement (https://www.springermedizin.de/resource/supplementary/13075_2004_1631_MOESM2_ESM.pdf/9690218)

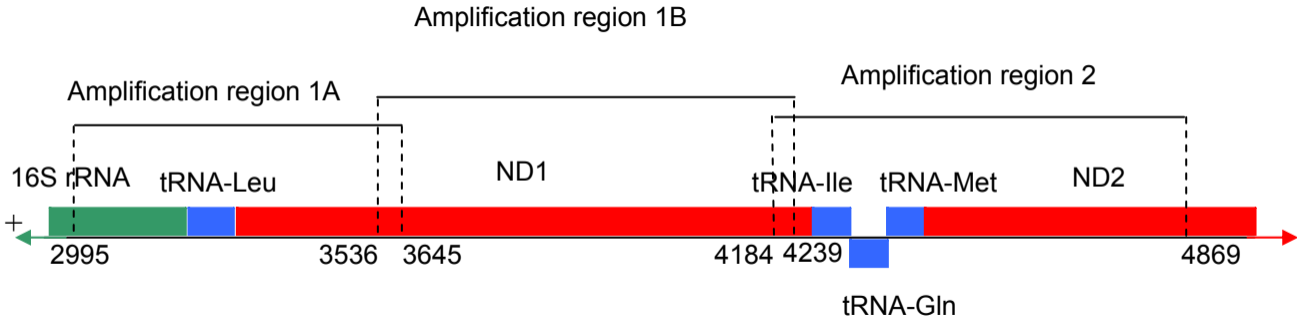

Supplement: MOESM2 [file 9690218]
